# Supplementary material for: Strategies to Connect Low-Income Communities with the Proposed Sewerage Network of the Dhaka Sanitation Improvement Project, Bangladesh: A Qualitative Assessment of the Perspectives of Stakeholders
Source: MDPI journal article supplement (doi:10.3390/ijerph17197201), 2020-10-01
Supplement: s1 [file s1]

Supplementary Table 1. Thematic distribution of codes and selection

| Thematic Areas                                    | Categories                              | Sub-categories                           | Codes                                      | Responses               |         |             |     |
|---------------------------------------------------|-----------------------------------------|------------------------------------------|--------------------------------------------|-------------------------|---------|-------------|-----|
|                                                   |                                         |                                          |                                            | FGD                     |         |             | KII |
|                                                   |                                         |                                          |                                            | Landlord/<br>homeowners | Tenants | CBO leaders |     |
| <i>Perceptions of current sewerage facilities</i> | Current sewerage system of Dhaka city   | Current sanitation facilities            | shared toilet                              | ✓                       | ✓       | ✓           | ×   |
|                                                   |                                         |                                          | narrow lane                                | ✓                       | ✓       | ✓           | ✓   |
|                                                   |                                         |                                          | narrow connecting pipes                    | ✓                       | ✓       | ×           | ✓   |
|                                                   |                                         |                                          | no water supply facility inside the toilet | ✓                       | ✓       | ✓           | ×   |
|                                                   | Opportunities                           | Where faecal matters finally discharged? | NGO provided toilets                       | ✓                       | ✓       | ✓           | ×   |
|                                                   |                                         |                                          | storm drainage                             | ✓                       | ✓       | ✓           | ✓   |
|                                                   | Perception regarding sewerage system    | Common problems                          | septic tanks                               | ×                       | ✓       | ×           | ×   |
|                                                   |                                         |                                          | pipe blockage                              | ✓                       | ✓       | ×           | ✓   |
|                                                   |                                         |                                          | pipe leakage                               | ✓                       | ✓       | ×           | ×   |
|                                                   |                                         |                                          | Waterlogging                               | ✓                       | ✓       | ×           | ✓   |
|                                                   |                                         |                                          | frequent overflow                          | ×                       | ✓       | ✓           | ×   |
|                                                   |                                         |                                          | bad odor                                   | ✓                       | ✓       | ×           | ×   |
|                                                   |                                         |                                          | Cholera                                    | ✓                       | ✓       | ×           | ×   |
|                                                   |                                         |                                          | skin disease                               | ×                       | ✓       | ×           | ×   |
|                                                   |                                         |                                          | the government                             | ✓                       | ✓       | ✓           | ×   |
|                                                   |                                         |                                          | DWASA                                      | ✓                       | ✓       | ✓           | ✓   |
| Who is responsible?                               | Who is responsible?                     | NGOs                                     | ✓                                          | ✓                       | ✓       | ✓           |     |
|                                                   |                                         | Landlords                                | ×                                          | ✓                       | ✓       | ×           |     |
|                                                   |                                         | a portion of total installation cost     | ✓                                          | ×                       | ✓       | ×           |     |
| <i>Affordability of having</i>                    | Willingness to have sewerage connection | Willingness to connect                   | financial support for toilet improvement   | ✓                       | ×       | ✓           | ✓   |

|                                                                              |                    |                                                      |                                                                            |                                   |   |   |   |   |
|------------------------------------------------------------------------------|--------------------|------------------------------------------------------|----------------------------------------------------------------------------|-----------------------------------|---|---|---|---|
| <i>sewerage connection</i>                                                   | Willingness to pay | household type/size based service charges            | ×                                                                          | ✓                                 | ✓ | ✓ |   |   |
|                                                                              |                    | area-based subsidies                                 | ×                                                                          | ✓                                 | ✓ | × |   |   |
|                                                                              |                    | income-based subsidies                               | ✓                                                                          | ✓                                 | ✓ | × |   |   |
|                                                                              | Co-production      | GO/NGO's responsibility                              | government permission                                                      | ✓                                 | ✓ | ✓ | × |   |
|                                                                              |                    |                                                      | negotiate with the authority                                               | ×                                 | ✓ | ✓ | × |   |
|                                                                              |                    | Landlord/homeowners/community leaders responsibility | ensure sewerage facilities                                                 | ×                                 | ✓ | ✓ | × |   |
|                                                                              |                    |                                                      | regular monitoring                                                         | ✓                                 | × | ✓ | ✓ |   |
|                                                                              | Recommendation     | To implementing authority                            | pay the tariffs                                                            | ×                                 | ✓ | × | × |   |
|                                                                              |                    |                                                      | widen the roads                                                            | ×                                 | × | ✓ | ✓ |   |
|                                                                              |                    | preferred payment methods                            | wider sewerage pipes                                                       | ✓                                 | × | ✓ | ✓ |   |
|                                                                              |                    |                                                      | monthly bills                                                              | ✓                                 | ✓ | ✓ | ✓ |   |
|                                                                              |                    |                                                      | one-time payment                                                           | ✓                                 | × | ✓ | × |   |
| equated monthly instalments (EMI)                                            |                    |                                                      | ✓                                                                          | ×                                 | ✓ | × |   |   |
| cash vouchers                                                                | ✓                  | ×                                                    | ✓                                                                          | ×                                 |   |   |   |   |
| <i>Challenges and opportunities of connecting LICs to a sewerage network</i> | Proposed policy    | Plan for sewerage connection installation            | force to connect (for the houses within 100 meters of proposed trunk main) | ×                                 | × | × | ✓ |   |
|                                                                              |                    | Plan for tariffs                                     | subsidized/reduced tariffs                                                 | ×                                 | ✓ | ✓ | ✓ |   |
|                                                                              | Strategies         | Possible strategies                                  | Sewerage network on government's cost                                      | ✓                                 | ✓ | ✓ | ✓ |   |
|                                                                              |                    |                                                      | improve existing toilets                                                   | ✓                                 | ✓ | ✓ | ✓ |   |
|                                                                              |                    |                                                      | subsidised service charges                                                 | ✓                                 | ✓ | × | ✓ |   |
|                                                                              |                    | Other feasible strategies                            | providing loans                                                            | ✓                                 | × | × | ✓ |   |
|                                                                              |                    |                                                      | on-site sanitation                                                         | ✓                                 | × | × | ✓ |   |
|                                                                              |                    |                                                      | communal tank                                                              | ×                                 | × | × | ✓ |   |
|                                                                              | Barriers of being  | Problem issues                                       | Major risks                                                                | separating industrial waste lines | × | × | × | ✓ |
|                                                                              |                    |                                                      |                                                                            | growing populations               | × | × | × | ✓ |
| high-rise buildings                                                          |                    |                                                      |                                                                            | ×                                 | × | × | ✓ |   |

|                                               |                    |                        |                                            |   |   |   |   |
|-----------------------------------------------|--------------------|------------------------|--------------------------------------------|---|---|---|---|
| <i>connected with the sewerage network</i>    |                    | Major challenges       | narrow roads                               | ✓ | ✓ | ✓ | ✓ |
|                                               |                    |                        | overlapping of various utility connections | × | × | × | ✓ |
|                                               |                    |                        | 20% coverage                               | × | × | × | ✓ |
|                                               |                    |                        | old sewerage network                       | ✓ | × | × | ✓ |
| <i>Perceived benefits of sewer connection</i> | Perceived benefits | environmental benefits | Safe disposal                              | ✓ | ✓ | ✓ | ✓ |
|                                               |                    |                        | no bad odour                               | ✓ | ✓ | ✓ | × |
|                                               |                    |                        | no clogged drain                           | ✓ | × | ✓ | ✓ |
|                                               |                    |                        | safe drinking water                        | ✓ | ✓ | ✓ | × |
|                                               |                    |                        | no contact with wastewater                 | ✓ | ✓ | × | × |
|                                               |                    | health benefits        | no overflow                                | ✓ | ✓ | × | × |
|                                               |                    |                        | no contact with pathogens                  | ✓ | ✓ | × | × |
|                                               |                    |                        | no contamination                           | ✓ | ✓ | ✓ | ✓ |
|                                               |                    |                        | no mosquitoes and flies                    | ✓ | ✓ | × | × |
|                                               |                    |                        | no breathing problems                      | ✓ | ✓ | ✓ | × |
|                                               |                    |                        | no skin diseases                           | ✓ | ✓ | × | × |

\*\*Ticks and crosses beside the codes indicating that which codes were frequently mentioned by which groups of the particip.
